## Single cell RNA sequencing ecosystem

### **FASTGenomics: An analytical ecosystem for single-cell RNA sequencing data**

Claus J. Scholz<sup>1</sup>, Paweł Biernat<sup>1</sup>, Matthias Becker<sup>1</sup>, Kevin Baßler<sup>1</sup>, Patrick Günther<sup>1</sup>, Jenny Balfer<sup>2</sup>, Henning Dickten<sup>2</sup>, Lars Flöer<sup>2</sup>, Kathrin Heikamp<sup>2</sup>, Philipp Angerer<sup>2,3</sup>, Mathias Heilig<sup>2</sup>, Ralf Karle<sup>2</sup>, Meike Köhler<sup>2</sup>, Thomas Mazurkiewicz<sup>2</sup>, Martin Mönninghoff<sup>2</sup>, Christian Sauer<sup>2</sup>, Albrecht Schick<sup>2</sup>, Gerhard Schlemm<sup>2</sup>, Roland Weigelt<sup>2</sup>, Martin Winkler<sup>2</sup>, Thomas Ulas<sup>1</sup>, Fabian Theis<sup>3</sup>, Stephan Huthmacher<sup>2</sup>, Christina Kratsch<sup>2,\*</sup>, Joachim L. Schultze<sup>1,4,\*</sup>

1 Genomics and Immunoregulation, Life & Medical Sciences (LIMES) Institute, University of Bonn, 53115 Bonn, Germany

2 Comma Soft AG, 53229 Bonn, Germany

3 Institute of Computational Biology, German Research Center for Environmental Health, Helmholtz Center Munich, 85764 Munich, Germany

4 Platform for Single Cell Genomics and Epigenomics, German Center for Neurodegenerative Diseases and the University of Bonn, 53175 Bonn, Germany

\* Corresponding authors:

Joachim L. Schultze, Genomics and Immunoregulation, Life & Medical Sciences Institute, Carl Troll Strasse 31, 53115 Bonn, Germany, Email: [j.schultze@uni-bonn.de](mailto:j.schultze@uni-bonn.de), Tel: +49-228-73-62787

Christina Kratsch, Comma Soft AG, Pützchens Chaussee 202, 53229 Bonn, Germany, Email: [chistina.kratsch@comma-soft.com](mailto:chistina.kratsch@comma-soft.com)

Short title: Single cell RNA sequencing ecosystem

Key words: single cell genomics, single cell RNA-sequencing, ecosystem, systems biology

## Single cell RNA sequencing ecosystem

### 1 **Introduction**

2 Recent technological advances increased the resolution of transcriptomics from cell populations  
3 (“bulk”) to single cells<sup>1</sup>. While only few cells were assessed in initial projects<sup>2,3</sup>, evolving technologies  
4 now allow the analysis of thousands of cells<sup>4-6</sup>, with the largest publicly available dataset currently  
5 comprising more than 1.3 million cells<sup>7</sup>. In contrast to bulk RNA sequencing (RNA-seq), single cell (sc)  
6 technologies are much more demanding due to high technical variation with zero-inflation being a  
7 major property<sup>8</sup>. As a consequence, a myriad of novel computational approaches and tools have been  
8 developed for the different scRNA-seq technologies<sup>9</sup>, but these thriving innovations also constitute a  
9 lack of widely accepted gold standards for data analysis. By construction, many of the proposed  
10 algorithms and approaches address only certain steps in the analytical scRNA-seq workflow, are  
11 adapted to certain scRNA-seq technologies, or cannot be easily combined with other tools, limiting  
12 their broad applicability. Notable exceptions are software packages like Monocle<sup>10</sup>, Seurat<sup>11</sup> and  
13 Scanpy<sup>12</sup>, which are well documented, cover big parts of the analysis workflow, and are flexible in their  
14 application; nevertheless, due to their command line-based environments, they are still restricting  
15 access to scRNA-seq for the broader life and medical sciences community. More user-friendly tools  
16 with graphical user interfaces have been introduced, like Granatum<sup>13</sup>, which offers a local installation,  
17 or the online tool ASAP<sup>14</sup> and the commercial solution SeqGeq<sup>15</sup>. In their current versions, they offer  
18 popular analysis algorithms, yet are limited in scalability in a multi-user setting, data security, usability  
19 of data varying in size over several orders of magnitude, and integration of own analytical concepts.  
20 Especially for largest-scale single cell genomics undertakings like the Human Cell Atlas (HCA)<sup>16</sup>, existing  
21 tools provide only limited analytical performance due to inefficient resource allocation for exploding  
22 memory and computing requirements for datasets in the magnitude of millions of cells, thus  
23 underscoring the necessity for a powerful software solution tailored to efficiently handle mega-  
24 analyses through distributed computing.

25 Single cell genomics - with scRNA-seq leading the way - will revolutionize the life and medical  
26 sciences<sup>8,17-19</sup>. Here, we postulate that an analytical ecosystem for single cell genomics applications  
27 will foster research and development in this field. Such an ecosystem should give computational  
28 experts a platform to make their tools available to a broader audience in a user-friendly fashion, allow  
29 high-end users to develop individualized workflows, and provide the novice user a computational  
30 environment to get acquainted with the special computational requirements for single cell analysis.  
31 Furthermore, such an ecosystem should serve as a platform for the community to share public datasets  
32 with a broader audience by following the FAIR Guiding Principles for scientific data management and  
33 stewardship<sup>20</sup>, provide a scalable infrastructure for projects with large datasets even across numerous  
34 institutions, host benchmarking capabilities for newly developed algorithms for the analysis of scRNA-  
35 seq data, and even serve as a portal for large international projects such as the HCA<sup>16</sup>. Finally, an  
36 analytical ecosystem must implement best practice measures that agree with institutional and  
37 governmental data security regulations. To address all these requirements, we have developed  
38 FASTGenomics (<https://fastgenomics.org>) as a powerful, efficient, versatile, robust, safe and intuitive  
39 analytical ecosystem for single-cell transcriptomics. Access to the FASTGenomics ecosystem and its  
40 functionality is granted for free upon registration to allow unrestricted interaction with the single cell  
41 genomics community and especially academia. Furthermore, as suggested by the HCA white paper and  
42 guided by representatives of the HCA, the implementation of FASTGenomics as a portal for the HCA is  
43 currently on its way.

44  
45

## Single cell RNA sequencing ecosystem

### 46 **App Store in FASTGenomics serves as platform for novel algorithms**

47 At the heart of FASTGenomics is a hybrid app store (**Figure 1A**) optionally composed of public (cloud)  
48 and private (local) app repositories hosting algorithms for calculations and data visualization. Novel  
49 algorithms can be provided as new apps by the computational biology community (**Figure 1B**). The  
50 well-documented application program interface (API) (**Supplementary Information “Description of  
51 the API of FASTGenomics”**) defines data input and output (**Figure 1C**) and allows seamless integration  
52 into the FASTGenomics ecosystem. Apps submitted to the public app repository  
53 (<https://github.com/fastgenomics>) are included in the complete end-user environment  
54 (**Supplementary Information “Detailed description of end-user experience of the FASTGenomics  
55 ecosystem”**). Additionally, designing customized workflows integrating custom-made apps is a major  
56 feature of FASTGenomics (**Figure 1D**). Furthermore, the workflow editor allows to adjust  
57 parametrization of apps, thus providing a maximum of analytical flexibility. Currently, workflow editing  
58 is done via the command line, the next version of the workflow editor is planned to provide an intuitive  
59 graphical user interface with functionality to share custom workflows (**Supplementary Figure S1**).

60

### 61 **Architecture, scalability and data security of the Docker-based hybrid model of FASTGenomics**

62 The FASTGenomics ecosystem has been implemented as a Docker<sup>21</sup>-based cloud solution, which can  
63 also be used as a local environment with a community-wide app repository (hybrid design) allowing to  
64 share data, apps and workflows, but also information, expertise and knowledge about single cell  
65 genomic analyses (**Figure 1A**, for a user perspective, **Supplementary Figure S2** for architectural  
66 specifications, for more details see **Supplementary Information “Technical realization of  
67 FASTGenomics with Docker-based cloud solution”**). Alternatively, entirely local installations – as they  
68 might be required within industry – are also possible. While ensuring standardization and reduced  
69 administrative burden, the modular, docker-based hybrid cloud solution of FASTGenomics also  
70 provides the necessary scalability to run projects with very large datasets. A dynamic allocation and  
71 flexible use of available resources will be achieved by leveraging Kubernetes technology in the next  
72 release of the platform<sup>22,23</sup>.

73 In its current version, FASTGenomics is being developed according to EU-GDPR (General Data  
74 Protection Regulation) and the German Federal Data Protection Act (“Bundesdatenschutzgesetz”,  
75 BDSG), one of the strictest data protection laws in the world. To minimize security issues related to  
76 multi-user access to the platform and the use of custom apps, FASTGenomics implements a rigorous  
77 multi-layer security concept of data encryption, controlled access and transfer to protect study data  
78 (expression tables, sample metadata and analysis results) as well as user data from unauthorized  
79 access and manipulation (**Supplementary Figure S3**). A data protection concept has been developed  
80 accordingly and will be continuously updated according to legal requirements (**Supplementary  
81 Information “Data Security Concept within FASTGenomics”**).

82

### 83 **User-friendly computational environment**

84 Within the FASTGenomics ecosystem, analyses can be initiated and monitored from essentially any  
85 web-compatible hardware with a web browser, without requiring extensive computing or memory  
86 resources locally. For the end-user following registration, FASTGenomics provides an interface for data  
87 upload (**Supplementary Figure S4A**, **Supplementary Information “Description of data upload via  
88 upload Dock in FASTGenomics”**), starting from count tables and experimental metadata, followed by  
89 standardized quality checks, e.g. average molecule counts, gene types, and quantification of batch

## Single cell RNA sequencing ecosystem

90 effects (**Supplementary Figure S4C-E**), and two pre-defined data analysis and visualization workflows,  
91 ‘Subtype Discovery’ and ‘Pseudo Time Analysis’ (**Figure 1D**). The former includes a neural network  
92 approximation of the parametric tSNE<sup>24</sup> and a 3D visualization of cells with coloring according to cluster  
93 assignments, gene expression and metadata (see also **Supplementary Table 1**). Each analysis results  
94 in the definition of genes of interest and a functional categorization with the help of external  
95 databases, e.g. Gene Ontology (GO<sup>25</sup>). Workflows in FASTGenomics end with a summary, a detailed  
96 description of all analysis steps including information about algorithms, software, versions, and  
97 parametrizations used as well as input data and results produced (**Figure 1D, Supplementary Figure**  
98 **S5A, S5B, Supplementary Information “Description of Summary of any given analysis”**). The summary  
99 is intended to maximize reproducibility and transparency of the analysis, which could be made  
100 available e.g. in scientific publications or within documentation required in regulatory environments.

101

### 102 **Platform for sharing datasets for further public exploitation**

103 Another important feature of FASTGenomics is a standardized package for public dataset presentation,  
104 which we utilized to present 10 recently published datasets ranging from 482 to 68,579 cells per  
105 dataset (**Supplementary Table 2**)<sup>5,26–34</sup>. Available datasets can be connected with standard workflows  
106 provided by FASTGenomics, but also with customized apps and workflows as exemplified for a previous  
107 MARS-Seq dataset (**Supplementary Figure S6**)<sup>31</sup>. By combining a dataset with the initial analysis, the  
108 data can be examined by anybody following the same algorithmic settings as previously reported in  
109 the literature. Moreover, this also allows to compare different analysis strategies directly on the same  
110 platform. We also performed concordance analyses for selected datasets presented in FASTGenomics  
111 (**Figure 2A**) and focus here on a dataset with 3,005 cells published by Zeisel et al.<sup>34</sup>. Using the BACKSPIN  
112 clustering algorithm, a total of 9 clusters that were assigned to 7 classes of cell types were previously  
113 identified in the dataset, while after our neural network-based dimensionality reduction a subset of  
114 2,375 cells could be assigned to 16 clusters. Thus, the FASTGenomics ‘subtype discovery’ standard  
115 workflow revealed a more fine-grained cluster structure than the BACKSPIN algorithm while preserving  
116 the co-clustering of functionally closely related cell types. In particular, neuronal and glial cell types  
117 were clearly distinguished from each other as well as from vasculature; in more detail,  
118 oligodendrocytes and pyramidal neurons were each assigned to one FASTGenomics cluster, while  
119 interneurons were clustered to six main classes. Quantitatively this translates to an adjusted mutual  
120 information value of 0.75 and median concordance rates of 96.5% for FASTGenomics and 90% for  
121 BACKSPIN (**Figure 2AB, Supplementary Information**). Such measures might be also used to estimate  
122 specialized analyses settings in previously published datasets. Collectively, the option to freely share  
123 previously published large datasets on FASTGenomics allows intuitive and interactive cross-  
124 examination, which goes far beyond the current options in scientific publications.

125

### 126 **FASTGenomics provides higher flexibility and scalability compared to existing platforms**

127 Next, we intended to compare FASTGenomics to the three currently available GUI-based platforms  
128 ASAP<sup>14</sup>, Granatum<sup>13</sup> and SeqGeq<sup>15</sup> (for detailed setup see **Supplementary Information “Setup of ASAP,**  
129 **Granatum and SeqGeq for comparison with FASTGenomics”**). We utilized five datasets ranging from  
130 1,920<sup>33</sup> to 68,579 cells<sup>29</sup> and compared for data upload, pre-processing cell clustering, differential gene  
131 expression analysis, pseudo time analysis and analysis summary. In their default configuration, among  
132 the four evaluated tools, only FASTGenomics performed all steps with all datasets (**Figure 2C**). We  
133 furthermore determined the resources needed by FASTGenomics to compute analyses with different

## Single cell RNA sequencing ecosystem

134 dataset sizes (experiment details in “**Resource Requirements of a FASTGenomics Analysis**  
135 **Workflow**”). Analysis runtime and memory requirements are both strongly correlated and depend on  
136 the number of cells analyzed; furthermore, analysis of all datasets across the tested size range is  
137 feasible with a contemporary desktop computer (**Figure 2D**).

138

### 139 **Outlook**

140 In upcoming versions of FASTGenomics, datasets, apps and workflows can be shared in private  
141 spaces/sections between collaboration partners prior to publishing, thus providing the infrastructure  
142 for multi-institutional collaboration projects. Furthermore, import/export apps will be implemented  
143 to be fully interoperable with established analysis software tools like Monocle<sup>10</sup>, Scanpy<sup>12</sup>, Scater<sup>35</sup>,  
144 Seurat<sup>11</sup>, etc., but also with data repositories like Gene Expression Omnibus (GEO)<sup>36</sup>. Finally, a  
145 connection of FASTGenomics to major laboratory information management systems (LIMS) for the  
146 import of experimental variables as metadata for new datasets as well as the export of the analysis  
147 summary back to the experimenters’ LIMS is currently evaluated and discussed with future users.

148

### 149 **Conclusion**

150 Taken together, FASTGenomics is designed as a secure, flexible, scalable but also standardized  
151 platform for single cell RNA-seq data, open to the scientific community. A major feature is to provide  
152 highest reproducibility and transparency for single cell data analysis to the whole community. Due to  
153 its modular and open structure it could also serve as a platform for community-wide benchmarking for  
154 novel algorithms and even serve as one of the tertiary portals planned within the HCA data  
155 coordination platform of the Human Cell Atlas<sup>16</sup>. Furthermore, by design, it scales already routinely to  
156 more than  $5 \times 10^4$  cells per project and prototype apps suggest that scaling to  $10^6$  cells is also possible.  
157 Moreover, its hybrid design will also allow using FASTGenomics on premise, which might be of interest  
158 to clinical research and the pharmaceutical industry.

159

### 160 **Figure Legends**

161 **Figure 1: FAST Genomics ecosystem. (A)** Hybrid app store concept. To provide both the advantages of  
162 community access to the FASTGenomics framework as well as the security of a private working  
163 environment, FASTGenomics runs in the cloud and can also be installed on premise. The cloud  
164 installation allows the usage of public apps and exchange with the global research community, whereas  
165 the on-premise installation could run on a local cluster. Additional local app repositories and data  
166 storage can be added for private access only. **(B)** Typical structure of a FASTGenomics workflow. All  
167 FASTGenomics workflows consist of calculation apps (such as quality checks, data normalization,  
168 dimensionality reduction, clustering, ...) that take inputs and consecutively produce new results for  
169 upstream calculation apps. Selected outputs of the calculation workflow are displayed in the browser  
170 with the help of visualization apps in the according visualization workflow. **(C)** Structure of a  
171 FASTGenomics app. Apps are Docker containers that interact with the FASTGenomics framework using  
172 an interface for data input and a configuration file providing necessary parameters for the analysis.  
173 Each FASTGenomics app dynamically generates a summary of the analysis performed by the app that  
174 is collected by the FASTGenomics summary service. Depending on app type, different channels are  
175 used for results, calculation apps write output to disk, whereas visualization apps send output to the

## Single cell RNA sequencing ecosystem

176 web browser. The use of the Docker framework enables app developers to implement algorithms in  
177 any programming language of choice. A detailed tutorial for the development of calculation and  
178 visualization apps as well as sample code can be found at the public FASTGenomics app repository  
179 (<https://github.com/fastgenomics>). **(D)** Workflow definitions and app concept: workflow definitions  
180 are configuration files that describe the calculation and visualization apps used for a specific workflow.  
181 User-defined workflows can be added simply by creating new workflow definitions, which may recycle  
182 previously defined apps. In particular, apps for the exploration of gene candidate lists with the help of  
183 DE analysis and functional annotation are typical candidates for multi-workflow apps. All workflows  
184 end with a detailed summary of the analyses performed to ensure maximum transparency and  
185 reproducibility.

186

187 **Fig 2: Reproducibility of workflows and performance of FASTGenomics. (A)** Clustering results of  
188 individual cells generated with the standard 'subtype discovery' workflow in FASTGenomics were  
189 compared to published findings by determination of the adjusted mutual information (AMI). Immune  
190 cell datasets<sup>29,31</sup> displayed a lower degree of concordance than neuronal<sup>34</sup>, cancer<sup>27</sup> and retinal tissue<sup>5</sup>  
191 datasets, presumably due to the lower RNA content of immune cells<sup>29</sup> and the lower number of genes  
192 expressed<sup>27</sup>. **(B)** FASTGenomics (FG) cluster assignments compared to published cell types<sup>34</sup>. For each  
193 FG cluster, the proportion of main cell types (inner circle) and subtypes (outer circle) are shown. The  
194 FASTGenomics standard 'subtype discovery' workflow clearly distinguished single-cell transcriptomes  
195 at higher resolution than main cell types, but with lower resolution than the published subclustering  
196 approach. Based on single-cell transcriptomic data, biologically meaningful subclasses were generated  
197 by the FASTGenomics 'subtype discovery' workflow, classifying neuronal and glial cells, vasculature  
198 and immune cell types in distinct units. **(C)** Performance comparison between FASTGenomics and three  
199 additional GUI-based platforms for single cell analysis. FASTGenomics (<https://fastgenomics.org>) was  
200 compared to the online tool ASAP (<https://asap.epfl.ch/>) and local installations of Granatum  
201 (<http://garmiregroup.org/granatum/app>) and SeqGeq (<https://www.flowjo.com/solutions/seqgeq>)  
202 installed on a 64 bit Windows 10 machine with Intel i7 6700K CPU and 32 GB RAM). Comparison was  
203 performed in 7 categories (data upload, data preprocessing, cell clustering, differential gene  
204 expression, functional analysis, pseudotime analysis, analysis summary). Datasets of various sizes,  
205 ranging from 1,920 to 68,579 cells<sup>5,29,32-34</sup> were used to assess scalability of the platforms. The size of  
206 the largest dataset, for which an analysis task could be accomplished is shown for all evaluated  
207 pipelines. **(D)** Required resources for analysis of data sets of various sizes<sup>5,29,32-364</sup>. Maximum memory  
208 usage (blue dots) and overall analysis runtime (red dots) to complete data normalization,  
209 dimensionality reduction and cell clustering are shown depending on the number of cells contained in  
210 each analyzed dataset.

211

Single cell RNA sequencing ecosystem

212 **References**

- 213 1. Picelli, S. Single-cell RNA-sequencing: The future of genome biology is now. *RNA Biol.* 1–14  
214 (2016). doi:10.1080/15476286.2016.1201618
- 215 2. Shalek, A. K. *et al.* Single-cell transcriptomics reveals bimodality in expression and splicing in  
216 immune cells. *Nature* **498**, 236–240 (2013).
- 217 3. Islam, S. *et al.* Characterization of the single-cell transcriptional landscape by highly multiplex  
218 RNA-seq. *Genome Res.* **21**, 1160–1167 (2011).
- 219 4. Jaitin, D. A. *et al.* Massively parallel single-cell RNA-seq for marker-free decomposition of tissues  
220 into cell types. *Science* **343**, 776–779 (2014).
- 221 5. Macosko, E. Z. *et al.* Highly Parallel Genome-wide Expression Profiling of Individual Cells Using  
222 Nanoliter Droplets. *Cell* **161**, 1202–1214 (2015).
- 223 6. Gierahn, T. M. *et al.* Seq-Well: portable, low-cost RNA sequencing of single cells at high  
224 throughput. *Nat. Methods* **14**, 395–398 (2017).
- 225 7. 10X Genomics. Megacell 1.3 Mio dataset. (2017). Available at:  
226 [https://community.10xgenomics.com/t5/10x-Blog/Our-1-3-million-single-cell-dataset-is-ready-](https://community.10xgenomics.com/t5/10x-Blog/Our-1-3-million-single-cell-dataset-is-ready-to-download/ba-p/276)  
227 [to-download/ba-p/276](https://community.10xgenomics.com/t5/10x-Blog/Our-1-3-million-single-cell-dataset-is-ready-to-download/ba-p/276). (Accessed: 6th November 2017)
- 228 8. Stegle, O., Teichmann, S. A. & Marioni, J. C. Computational and analytical challenges in single-cell  
229 transcriptomics. *Nat. Rev. Genet.* **16**, 133–145 (2015).
- 230 9. Poirion, O. B., Zhu, X., Ching, T. & Garmire, L. Single-Cell Transcriptomics Bioinformatics and  
231 Computational Challenges. *Front. Genet.* **7**, 163 (2016).
- 232 10. Trapnell, C. *et al.* The dynamics and regulators of cell fate decisions are revealed by  
233 pseudotemporal ordering of single cells. *Nat. Biotechnol.* **32**, 381–386 (2014).
- 234 11. Satija, R., Farrell, J. A., Gennert, D., Schier, A. F. & Regev, A. Spatial reconstruction of single-cell  
235 gene expression data. *Nat. Biotechnol.* **33**, 495–502 (2015).
- 236 12. Wolf, F. A., Angerer, P. & Theis, F. J. SCANPY: large-scale single-cell gene expression data  
237 analysis. *Genome Biol.* **19**, 15 (2018).

## Single cell RNA sequencing ecosystem

- 238 13. Zhu, X. *et al.* Granatum: a graphical single-cell RNA-Seq analysis pipeline for genomics scientists.  
239 *Genome Med.* **9**, 108 (2017).
- 240 14. Gardeux, V., David, F. P. A., Shajkofci, A., Schwalie, P. C. & Deplancke, B. ASAP: a Web-based  
241 platform for the analysis and interactive visualization of single-cell RNA-seq data. *Bioinforma.*  
242 *Oxf. Engl.* (2017). doi:10.1093/bioinformatics/btx337
- 243 15. SeqGeq® | FlowJo, LLC. Available at: <https://www.flowjo.com/solutions/seqgeq>. (Accessed: 2nd  
244 February 2018)
- 245 16. Human Cell Atlas. The Human Cell Atlas White Paper. Available at:  
246 <https://www.humancellatlas.org/news/13>. (Accessed: 6th November 2017)
- 247 17. Shapiro, E., Biezuner, T. & Linnarsson, S. Single-cell sequencing-based technologies will  
248 revolutionize whole-organism science. *Nat. Rev. Genet.* **14**, 618–630 (2013).
- 249 18. Jaitin, D. A., Keren-Shaul, H., Elefant, N. & Amit, I. Each cell counts: Hematopoiesis and immunity  
250 research in the era of single cell genomics. *Semin. Immunol.* **27**, 67–71 (2015).
- 251 19. Wagner, A., Regev, A. & Yosef, N. Revealing the vectors of cellular identity with single-cell  
252 genomics. *Nat. Biotechnol.* **34**, 1145–1160 (2016).
- 253 20. Wilkinson, M. D. *et al.* The FAIR Guiding Principles for scientific data management and  
254 stewardship. *Sci. Data* **3**, 160018 (2016).
- 255 21. Beaulieu-Jones, B. K. & Greene, C. S. Reproducibility of computational workflows is automated  
256 using continuous analysis. *Nat. Biotechnol.* **35**, 342–346 (2017).
- 257 22. Burns, B., Grant, B., Oppenheimer, D., Brewer, E. & Wilkes, J. Borg, Omega, and Kubernetes.  
258 *Queue* **14**, 10:70–10:93 (2016).
- 259 23. Schulz, W. L., Durant, T. J. S., Siddon, A. J. & Torres, R. Use of application containers and  
260 workflows for genomic data analysis. *J. Pathol. Inform.* **7**, (2016).
- 261 24. Maaten, L. Learning a Parametric Embedding by Preserving Local Structure. in *PMLR* 384–391  
262 (2009).
- 263 25. Gene Ontology Consortium. Gene Ontology Consortium: going forward. *Nucleic Acids Res.* **43**,  
264 D1049-1056 (2015).



## Single cell RNA sequencing ecosystem

- 265 26. Tirosh, I. *et al.* Single-cell RNA-seq supports a developmental hierarchy in human  
266 oligodendroglioma. *Nature* **539**, 309–313 (2016).
- 267 27. Tirosh, I. *et al.* Dissecting the multicellular ecosystem of metastatic melanoma by single-cell RNA-  
268 seq. *Science* **352**, 189–196 (2016).
- 269 28. Ziegenhain, C. *et al.* Comparative Analysis of Single-Cell RNA Sequencing Methods. *Mol. Cell* **65**,  
270 631–643.e4 (2017).
- 271 29. Zheng, G. X. Y. *et al.* Massively parallel digital transcriptional profiling of single cells. *Nat.*  
272 *Commun.* **8**, 14049 (2017).
- 273 30. Moignard, V. *et al.* Decoding the regulatory network of early blood development from single-cell  
274 gene expression measurements. *Nat. Biotechnol.* **33**, 269–276 (2015).
- 275 31. Mass, E. *et al.* Specification of tissue-resident macrophages during organogenesis. *Science* **353**,  
276 (2016).
- 277 32. Paul, F. *et al.* Transcriptional Heterogeneity and Lineage Commitment in Myeloid Progenitors.  
278 *Cell* **163**, 1663–1677 (2015).
- 279 33. Nestorowa, S. *et al.* A single-cell resolution map of mouse hematopoietic stem and progenitor  
280 cell differentiation. *Blood* **128**, e20-31 (2016).
- 281 34. Zeisel, A. *et al.* Brain structure. Cell types in the mouse cortex and hippocampus revealed by  
282 single-cell RNA-seq. *Science* **347**, 1138–1142 (2015).
- 283 35. McCarthy, D. J., Campbell, K. R., Lun, A. T. L. & Wills, Q. F. Scater: pre-processing, quality control,  
284 normalization and visualization of single-cell RNA-seq data in R. *Bioinforma. Oxf. Engl.* **33**, 1179–  
285 1186 (2017).
- 286 36. Barrett, T. *et al.* NCBI GEO: archive for functional genomics data sets--update. *Nucleic Acids Res.*  
287 **41**, D991-995 (2013).
- 288
- 289

## Single cell RNA sequencing ecosystem

### 290 **Acknowledgements**

291 We would like to thank John Marioni for fruitful interactions concerning the project to implement  
292 FASTGenomics as one of the portals for the HCA. This work was supported by a grant from the Federal  
293 Ministry for Economic Affairs and Energy (BMW i Project FASTGENOMICS). JLS is a member of the  
294 excellence cluster immunosensation. JLS is further supported by the DFG (Sachbeihilfe SCHU 950/9-1;  
295 SFB 704, projects A13, Z5; excellence cluster immunosensation).

296

### 297 **Author contributions**

298 CJS wrote the manuscript; CJS, PB, MB, KB, PG, JB, HD, LF, KH, PA, MK and TU designed analyses; CJS,  
299 PB, JB, HD, LF, KH, PA, MK, MM, CS, AS and GS implemented apps; HD, MH, RK, TM, MM, CS, AS, GS,  
300 RW and MW developed the platform; JB, HD, KH, RK, TM and CS contributed to the manuscript; KH  
301 and JB managed the project; SH perceived idea, managed and supervised the project; CK managed and  
302 supervised project, wrote the manuscript; JLS, FT discussed and improved the project and the  
303 manuscript; JLS perceived idea for the project, managed and supervised the project, wrote and  
304 designed the manuscript.

305

### 306 **Competing financial interests**

307 CJS, PB, MB, KB, PG, TU, FT and JLS declare no competing financial interests. PA, JB, HD, LF, KH, MH,  
308 RK, MK, TM, MM, CS, AS, GS, MW, SH and CK are paid employees of Comma Soft AG, a commercial  
309 company developing the FASTGenomics platform.

310

## Single cell RNA sequencing ecosystem

Figure 1

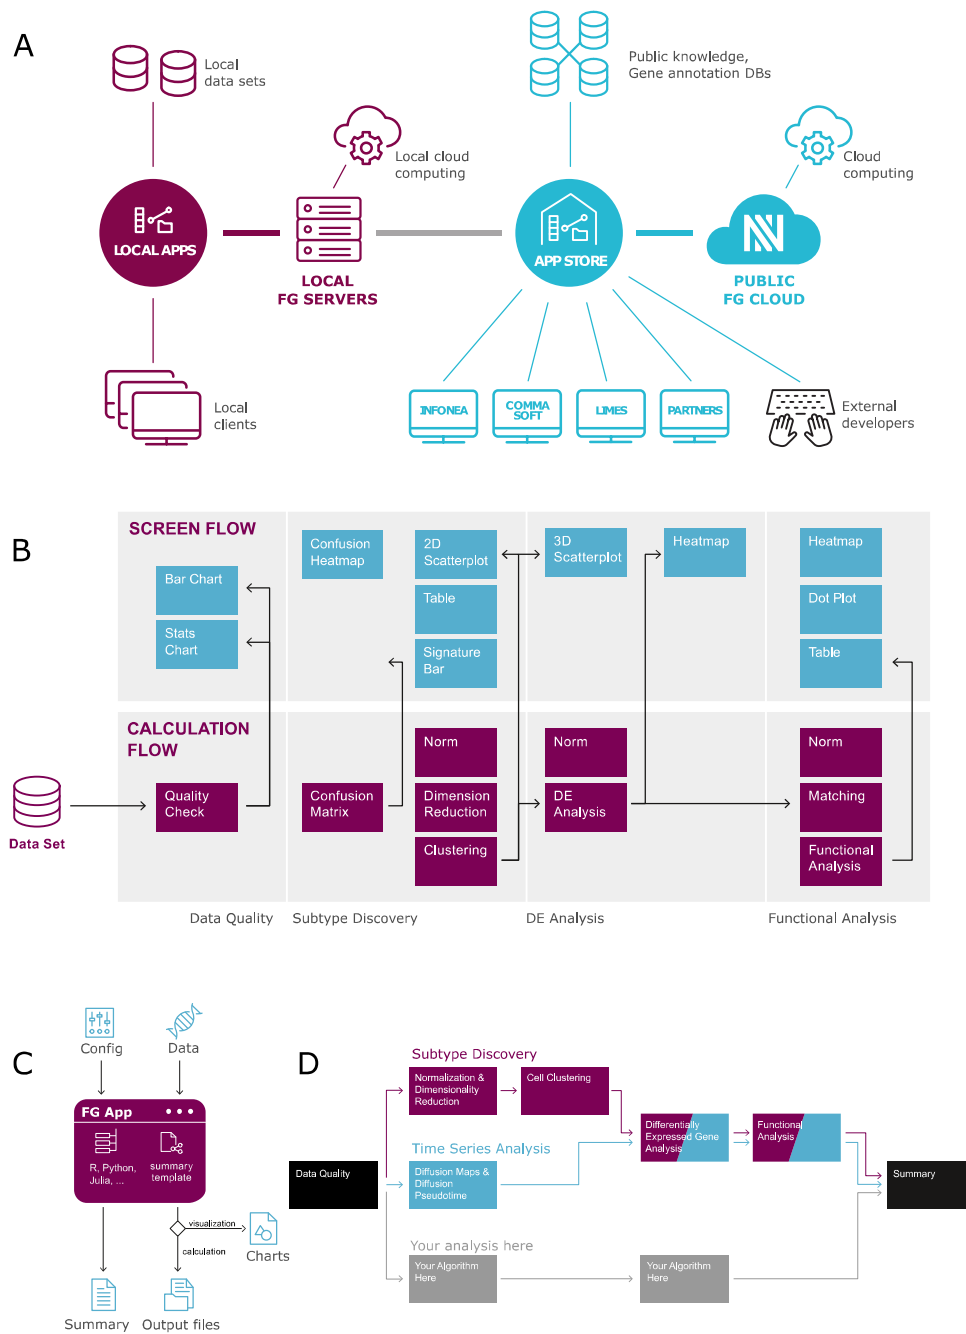

311

312

Single cell RNA sequencing ecosystem

Figure 2

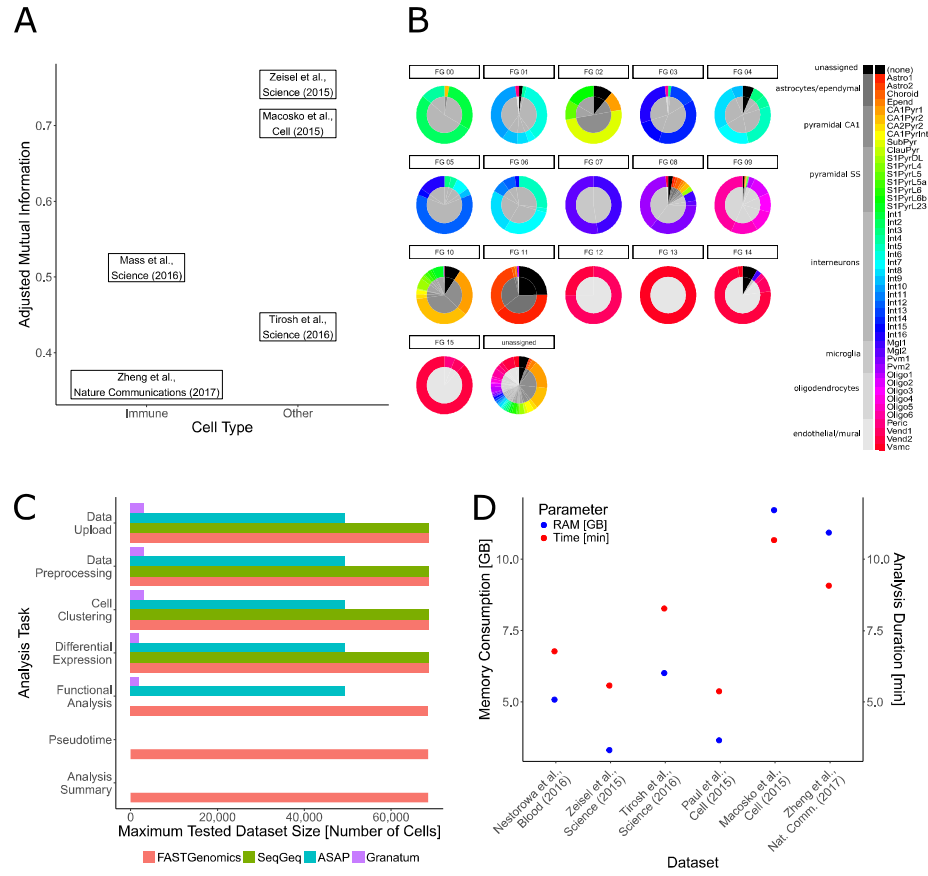

Source: https://www.biorxiv.org/content/10.1101/272476v1.full.pdf
